# Supplementary material for: Cast shadows reveal changes in glacier surface elevation
Source: Copernicus journal article supplement (doi:10.5194/tc-17-3535-2023), 2023-08-24
Supplement: Supplementary file 1 [file tc-17-3535-2023-supplement.pdf]

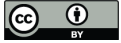

*Supplement of*

## **Cast shadows reveal changes in glacier surface elevation**

**Monika Pfau et al.**

*Correspondence to:* Monika Pfau ([monika.pfau@arcor.de](mailto:monika.pfau@arcor.de))

The copyright of individual parts of the supplement might differ from the article licence.

## Supplement S: Additional tables

**Table S1: Landsat bands used to map shadows on glaciers, including image metadata, the threshold to manually classify shadows on glaciers, and the number of bearing lines that cross shadows on glaciers. TM: Thematic Mapper, ETM+: Enhanced Thematic Mapper, OLI: Operational Land Imager, SRTM-1: DEM of the Shuttle Radar Topography Mission (30m resolution), swissALTI3D: DEM of Switzerland (5 m resolution), GLO-90: Copernicus DEM (90m resolution)**

| Glacier       | Acquisition Date | Landsat Mission | Band | Azimuth | Elevation | File Name in GeoTIFF format                       | Threshold between shadow and no-shadow | Number of bearing lines drawn                        |
|---------------|------------------|-----------------|------|---------|-----------|---------------------------------------------------|----------------------------------------|------------------------------------------------------|
| Great Aletsch | 06.02.1987       | TM              | 2    | 146.96  | 21.95     | LT05_L1TP_195028_19870206_20170213_01_T1_sr_band2 | 5,500                                  | 106 (SRTM-1, swissALTI3D), 107 (GLO-90)              |
| Great Aletsch | 18.02.1988       | TM              | 2    | 147.49  | 26.38     | LT05_L1TP_194028_19880218_20180215_01_T1_sr_band2 | 5,500                                  | 106 (SRTM-1), 105 (GLO-90, swissALTI3D)              |
| Great Aletsch | 11.02.1989       | TM              | 2    | 148.32  | 25.39     | LT05_L1TP_195028_19890211_20180215_01_T1_sr_band2 | 5,500                                  | 105 (SRTM-1), 106 (GLO-90)                           |
| Great Aletsch | 07.02.1990       | TM              | 2    | 146.88  | 22.34     | LT05_L1TP_194028_19900207_20180219_01_T1_sr_band2 | 5,500                                  | 105 (SRTM-1, swissALTI3D), 106 (GLO-90)              |
| Great Aletsch | 01.02.1991       | TM              | 2    | 147.64  | 20.64     | LT05_L1TP_195028_19910201_20180215_01_T2_sr_band2 | 5,500                                  | 106 (SRTM-1, swissALTI3D), 105 (GLO-90)              |
| Great Aletsch | 06.02.1993       | TM              | 2    | 147.11  | 22.21     | LT05_L1TP_195028_19930206_20180215_01_T1_sr_band2 | 5,500                                  | 106 (SRTM-1), 105 (GLO-90, swissALTI3D)              |
| Great Aletsch | 25.02.1994       | TM              | 2    | 144.21  | 28.10     | LT05_L1TP_195028_19940225_20180215_01_T1_sr_band2 | 5,500                                  | 100 (SRTM-1), 101 (GLO-90, swissALTI3D)              |
| Great Aletsch | 21.02.1995       | TM              | 2    | 142.356 | 25.60     | LT05_L1TP_194028_19950221_20180215_01_T1_sr_band2 | 5,500                                  | 102 (SRTM-1, swissALTI3D), 101 (GLO-90, swissALTI3D) |
| Great Aletsch | 21.02.1996       | TM              | 2    | 142.07  | 23.06     | LT05_L1TP_195028_19960215_20180215_01_T1_sr_band2 | 5,500                                  | 102 (SRTM-1, GLO-90, swissALTI3D)                    |
| Great Aletsch | 01.02.1997       | TM              | 2    | 148.58  | 21.19     | LT05_L1TP_195028_19970201_20180215_01_T1_sr_band2 | 5,500                                  | 108 (SRTM-1), 107 (GLO-90, swissALTI3D)              |
| Great Aletsch | 20.02.1998       | TM              | 2    | 148.90  | 27.88     | LT05_L1TP_195028_19980220_20180215_01_T1_sr_band2 | 5,500                                  | 105 (SRTM-1, swissALTI3D), 106 (GLO-90)              |
| Great Aletsch | 10.02.2000       | TM              | 2    | 149.53  | 24.20     | LT05_L1TP_195028_20000210_20171211_01_T1_sr_band2 | 5,500                                  | 106 (SRTM-1, GLO-90, swissALTI3D)                    |
| Great Aletsch | 14.02.2004       | TM              | 2    | 150.35  | 25.93     | LT05_L1TP_194028_20040214_20180311_01_T1_sr_band2 | 5,500                                  | 107 (SRTM-1), 106 (GLO-90), 108 (swissALTI3D)        |
| Great Aletsch | 07.02.2005       | TM              | 2    | 153.04  | 24.65     | LT05_L1TP_195028_20050207_20180130_01_T1_sr_band2 | 5,500                                  | 107 (SRTM-1), 108 (GLO-90), 109 (swissALTI3D)        |
| Great Aletsch | 10.02.2006       | TM              | 2    | 153.75  | 25.81     | LT05_L1TP_195028_20060210_20180311_01_T1_sr_band2 | 5,500                                  | 107 (SRTM-1), 109 (GLO-90, swissALTI3D)              |
| Great Aletsch | 22.02.2007       | TM              | 2    | 153.49  | 29.98     | LT05_L1TP_194028_20070222_20180118_01_T1_sr_band2 | 5,500                                  | 106 (SRTM-1, GLO-90),                                |

|               |            |      |   |        |       |                                                   |                             |                                               |
|---------------|------------|------|---|--------|-------|---------------------------------------------------|-----------------------------|-----------------------------------------------|
|               |            |      |   |        |       |                                                   |                             | 107 (swissALTI3D)                             |
| Great Aletsch | 18.02.2009 | TM   | 2 | 151.65 | 28.13 | LT05_L1TP_195028_20090218_20180302_01_T2_sr_band2 | 5,500                       | 109 (SRTM-1, swissALTI3D), 108 (GLO-90)       |
| Great Aletsch | 21.02.2010 | TM   | 2 | 152.59 | 29.46 | LT05_L1TP_195028_20100221_20161016_01_T1_sr_band2 | 5,500                       | 108 (SRTM-1, swissALTI3D), 106 (GLO-90)       |
| Great Aletsch | 08.02.2011 | TM   | 2 | 153.85 | 25.08 | LT05_L1TP_195028_20110208_20161010_01_T1_sr_band2 | 5,500                       | 109 (SRTM-1, GLO-90, swissALTI3D)             |
| Great Aletsch | 25.02.2014 | OLI  | 3 | 154.88 | 31.67 | LC08_L1TP_194028_20140225_20170425_01_T1_sr_band3 | 5,500                       | 108 (SRTM-1, swissALTI3D), 107 (GLO-90)       |
| Great Aletsch | 19.02.2015 | OLI  | 3 | 155.22 | 29.38 | LC08_L1TP_195028_20150219_20170412_01_T1_sr_band3 | 5,500                       | 107 (SRTM-1), 108 (GLO-90), 110 (swissALTI3D) |
| Great Aletsch | 15.02.2016 | OLI  | 3 | 155.68 | 27.95 | LC08_L1TP_194028_20160215_20170329_01_T1_sr_band3 | 5,500                       | 110 (SRTM-1), 109 (GLO-90), 111 (swissALTI3D) |
| Great Aletsch | 20.02.2018 | OLI  | 3 | 165.56 | 21,33 | LC08_L1TP_194028_20180220_20180308_01_T1          | 5,500                       | 92 (GLO-90)                                   |
| Great Aletsch | 22.02.2019 | OLI  | 3 | 155.72 | 27.70 | LC08_L1TP_195028_20190214_20190222_01_T1_sr_band3 | 5,500                       | 113 (SRTM-1), 109 (GLO-90), 112 (swissALTI3D) |
| Baltoro       | 11.02.1992 | TM   | 3 | 141.60 | 30.55 | LT05_L1TP_148035_19920211_20170123_01_T1_sr_band2 | 5,500                       | 42                                            |
| Baltoro       | 22.02.1996 | TM   | 3 | 135.05 | 31.43 | LT05_L1TP_148035_19960222_20170105_01_T1_sr_band2 | 5,000                       | 38                                            |
| Baltoro       | 24.01.2000 | ETM+ | 2 | 151.94 | 29.48 | LE07_L1TP_148035_20000124_20170213_01_T1_B2       | 200                         | 31                                            |
| Baltoro       | 15.02.2011 | TM   | 2 | 147.36 | 34.91 | LT05_L1TP_148035_20110215_20161010_01_T1_sr_band2 | 5,000                       | 30                                            |
| Baltoro       | 10.02.2015 | OLI  | 3 | 150.86 | 34.45 | LC08_L1TP_148035_20150210_20170413_01_T1_sr_band3 | 4,500                       | 29                                            |
| Baltoro       | 29.02.2016 | OLI  | 3 | 147.82 | 40.67 | LC08_L1TP_148035_20160229_20170329_01_T1_sr_band3 | 5,000                       | 16                                            |
| Baltoro       | 02.02.2018 | OLI  | 3 | 152.16 | 32.33 | LC08_L1TP_148035_20180202_20180220_01_T1_sr_band3 | 5,000                       | 29                                            |
| Baltoro       | 08.02.2020 | OLI  | 3 | 151.29 | 33.83 | LC08_L1TP_148035_20200208_20200211_01_T1_sr_band3 | 5,000                       | 28                                            |
| Gulkana       | 13.03.1986 | TM   | 2 | 157.84 | 21.25 | LT05_L2SP_068015_19860313_20200917_02_T1          | 3,300 (West) / 2,700 (East) | 42 (West) / 21 (East)                         |
| Gulkana       | 30.03.1989 | TM   | 2 | 157.45 | 29.41 | LT05_L2SP_067016_19890330_20200917_02_T1          | 3,300 / 3,000               | 20 / 10                                       |
| Gulkana       | 19.03.1999 | TM   | 2 | 160.07 | 25.25 | LT05_L2SP_066016_19990319_20200908_02_T1          | 3,900 / 3,800               | 21 / 8                                        |
| Gulkana       | 14.03.2009 | TM   | 2 | 162.21 | 23.80 | LT05_L1TP_066016_20090314_20160906_01_T1_sr_band2 | 5,500                       | 22 / 8                                        |
| Gulkana       | 04.03.2011 | TM   | 2 | 162.93 | 19.74 | LT05_L2SP_066016_20110304_20200823_02_T1          | 2,900 / 2,700               | 24 / 22                                       |
| Gulkana       | 06.03.2014 | OLI  | 3 | 165.73 | 17.11 | LC08_L1TP_066016_20140224_20170306_01_T1_sr_band3 | 6,500                       | 23 / 23                                       |
| Gulkana       | 27.02.2015 | OLI  | 3 | 165.49 | 18.12 | LC08_L1TP_066016_20150227_20170227_01_T1_sr_band3 | 7,500                       | 25 / 21                                       |
| Gulkana       | 21.02.2016 | OLI  | 3 | 165.60 | 15.81 | LC08_L1TP_067016_20160221_20170224_01_T1_sr_band3 | 7,000                       | 25 / 23                                       |

|               |                                 |      |   |        |       |                                                     |               |         |
|---------------|---------------------------------|------|---|--------|-------|-----------------------------------------------------|---------------|---------|
| Gulkana       | 02.03.2017                      | OLI  | 3 | 165.54 | 19.48 | LC08_L2SP_068016_20170302_20200905_02_T1            | 3,650 / 3,000 | 24 / 23 |
| Gulkana       | 07.03.2018                      | OLI  | 3 | 165.56 | 21.33 | LC08_L2SP_066016_20180307_20200901_02_T1            | 4,000 / 3,500 | 25 / 20 |
| Gulkana       | 22.02.2019                      | OLI  | 3 | 165.54 | 16.27 | LC08_L1TP_066016_20190222_2_20190308_01_T1_sr_band3 | 5,500         | 25 / 22 |
| Gulkana       | 16.02.2020<br>and<br>25.02.2020 | OLI  | 3 | 165.57 | 17.30 | LC08_L1TP_066016_20200225_20200313_01_T1_sr_band3   | 6,000         | 52 / 47 |
| Gulkana       | 06.03.2021                      | OLI  | 3 | 165.62 | 21.05 | LC08_L2SP_067016_20210306_20210317_02_T1            | 4,400 / 3,000 | 25 / 23 |
| South Cascade | 02.02.1987                      | TM   | 2 | 148.87 | 18.90 | LT05_L1TP_046026_19870202_20161003_01_T1_sr_band2   | 5,000         | 34      |
| South Cascade | 18.02.1993                      | TM   | 2 | 147.04 | 23.98 | LT05_L1TP_046026_19930218_20160928_01_T1_sr_band2   | 5,000         | 32      |
| South Cascade | 05.02.1994                      | TM   | 2 | 148.49 | 19.79 | LT05_L1TP_046026_19940205_20160927_01_T1_sr_band2   | 5,000         | 33      |
| South Cascade | 11.02.1996                      | TM   | 2 | 144.09 | 20.01 | LT05_L1TP_046026_19960211_20160925_01_T1_sr_band2   | 5,000         | 29      |
| South Cascade | 22.02.1997                      | TM   | 2 | 147.53 | 25.73 | LT05_L1TP_045026_19970222_20160924_01_T1_sr_band2   | 5,000         | 31      |
| South Cascade | 29.01.2000                      | ETM+ | 2 | 157.10 | 20.21 | LE07_L1TP_046026_20000129_20161003_01_T1_B2         | 100           | 32      |
| South Cascade | 20.02.2002                      | TM   | 2 | 150.97 | 25.98 | LT05_L1TP_045026_20020220_20160916_01_T1_sr_band2   | 5,000         | 32      |
| South Cascade | 07.02.2003                      | TM   | 2 | 151.18 | 21.32 | LT05_L1TP_045026_20030207_20160916_01_T2_sr_band2   | 5,000         | 33      |
| South Cascade | 10.02.2004                      | TM   | 2 | 152.29 | 22.59 | LT05_L1TP_045026_20040210_20160914_01_T2_sr_band2   | 5,000         | 33      |
| South Cascade | 15.02.2006                      | TM   | 2 | 154.72 | 25.25 | LT05_L1TP_045026_20060215_20160911_01_T1_sr_band2   | 5,000         | 29      |
| South Cascade | 02.02.2007                      | TM   | 2 | 157.05 | 21.44 | LT05_L1TP_045026_20070202_20160911_01_T1_sr_band2   | 5,000         | 31      |
| South Cascade | 07.02.2009                      | TM   | 2 | 154.31 | 22.46 | LT05_L1TP_045026_20090207_20160906_01_T1_sr_band2   | 5,000         | 32      |
| South Cascade | 17.02.2010                      | TM   | 2 | 154.56 | 25.93 | LT05_L1TP_046026_20100217_20160904_01_T1_sr_band2   | 5,000         | 32      |
| South Cascade | 20.02.2011                      | TM   | 2 | 154.07 | 26.82 | LT05_L1TP_046026_20110220_20160901_01_T1_sr_band2   | 5,000         | 33      |
| South Cascade | 15.02.2015                      | OLI  | 3 | 157.11 | 25.79 | LC08_L1TP_046026_20150215_20170301_01_T1_sr_band3   | 5,000         | 28      |
| South Cascade | 13.02.2017                      | OLI  | 3 | 157.28 | 25.30 | LC08_L1TP_045026_20170213_20180201_01_T2_sr_band3   | 5,000         | 31      |
| Sperry        | 28.02.1986                      | TM   | 2 | 147.03 | 27.79 | LT05_L1TP_041026_19860228_20161004_01_T1_sr_band2   | 3,500         | 25      |
| Sperry        | 19.02.2000                      | TM   | 2 | 149.88 | 25.04 | LT05_L1TP_041026_20000219_20160918_01_T1_sr_band2   | 3,500         | 11      |
| Sperry        | 27.02.2003                      | TM   | 2 | 149.10 | 28.04 | LT05_L1TP_041026_20030227_20160916_01_T1_sr_band2   | 3,500         | 27      |
| Sperry        | 19.02.2006                      | TM   | 2 | 154.37 | 26.61 | LT05_L1TP_041026_20060219_20160911_01_T1_sr_band2   | 3,500         | 12      |
| Sperry        | 25.02.2008                      | TM   | 2 | 153.74 | 28.54 | LT05_L1TP_041026_20080225_20160906_01_T1_sr_band2   | 3,500         | 12      |
| Sperry        | 25.02.2014                      | OLI  | 3 | 156.53 | 29.46 | LC08_L1TP_041026_20140225_20170307_01_T1_sr_band3   | 3,500         | 17      |
| Sperry        | 28.02.2015                      | OLI  | 3 | 156.08 | 30.42 | LC08_L1TP_041026_20150228_20170301_01_T1_sr_band3   | 3,500         | 20      |

**Table S2: DEMs used to simulate shadows on glaciers, including spatial resolution, acquisition date, and data source.**

| DEM                            | Investigated Glacier                          | Spatial resolution [m]        | Acquisition date                              | Source                                                                                                                                                                                              |
|--------------------------------|-----------------------------------------------|-------------------------------|-----------------------------------------------|-----------------------------------------------------------------------------------------------------------------------------------------------------------------------------------------------------|
| swissALTI3D                    | Great Aletsch                                 | (downsampled from 2 m to 5 m) | 2017-2018                                     | <a href="https://www.swisstopo.admin.ch/en/geodata/height/alti3d.html">https://www.swisstopo.admin.ch/en/geodata/height/alti3d.html</a>                                                             |
| ArcticDEM                      | Gulkana                                       | 2                             | 2009                                          | <a href="https://www.pgc.umn.edu/data/arcticdem">https://www.pgc.umn.edu/data/arcticdem</a><br>SETSM_WV01_20090616_10200100079A2600_1020010007<br>D06000_seg1_2m_v3.0.tif (used item: SETSM_~1.TIF) |
| SRTM-1                         | Great Aletsch, Baltoro, South Cascade, Sperry | ~30 (1-Arc second)            | 2000                                          | <a href="http://www.opentopography.org">http://www.opentopography.org</a>                                                                                                                           |
| SRTM-3                         | Great Aletsch, Baltoro                        | ~90 (3-Arc seconds)           | 2000                                          | <a href="http://www.opentopography.org">http://www.opentopography.org</a>                                                                                                                           |
| NASADEM                        | Great Aletsch, Baltoro                        | 30                            | 2000                                          | <a href="http://www.opentopography.org">http://www.opentopography.org</a>                                                                                                                           |
| ALOS World 3D (AW3D30)         | Great Aletsch, Baltoro                        | 30                            | 2006-2011                                     | <a href="http://www.opentopography.org">http://www.opentopography.org</a>                                                                                                                           |
| Copernicus Global DEM (GLO-30) | Great Aletsch, Baltoro                        | 30                            | 2011-2015                                     | <a href="http://www.opentopography.org">http://www.opentopography.org</a>                                                                                                                           |
| Copernicus Global DEM (GLO-90) | Great Aletsch, Baltoro                        | 90                            | 2011-2015                                     | <a href="http://www.opentopography.org">http://www.opentopography.org</a>                                                                                                                           |
| Viewfinderpanoramas DEM (VFP)  | Baltoro                                       | 90                            | 2000 incl. void fill data with variable dates | <a href="http://viewfinderpanoramas.org/">http://viewfinderpanoramas.org/</a>                                                                                                                       |

**Table S3: Prior and posterior distributions of the parameters in the hierarchical models of glacier elevation change  $\Delta h$  with year  $y$  using bearing lines (Eqs. 1-11).**

| Parameter       | Prior                              | Posterior                    |
|-----------------|------------------------------------|------------------------------|
|                 |                                    | Median   2.5%   97.5% of HDI |
| $\alpha$        | Normal (mean = 0, sd = 2.5)        | 0.23   -0.14   0.61          |
| $\beta$         | Normal (mean = 0, sd = 2.5)        | -0.31   -0.64   0.03         |
| $\sigma_\alpha$ | Normal (mean = 0, sd = 2.5) T(0, ) | 0.43   0.22   0.90           |
| $\sigma_\beta$  | Normal (mean = 0, sd = 2.5) T(0, ) | 0.38   0.19   0.80           |
| $\kappa$        | Normal (mean = 0, sd = 2.5) T(0, ) | 0.55   0.53   0.57           |
| $\zeta$         | LKJCholesky(1) on $\mathbf{R}$     | 0.74   -0.00   0.98          |

**Notes:** Priors refer to standardised input data pairs of  $\Delta h$  and  $y$  using a mean of zero and unit standard deviation. T(·, ·) indicates a truncation of the distribution at a lower or upper boundary. sd, standard deviation. Degrees of freedom are constant ( $\nu = 3$ ) and have no posterior estimate.

**Table S4: Prior and posterior distributions of the parameters in the hierarchical models of glacier elevation change  $\Delta h$  with year  $y$  using all data (within and outside the Landsat period) and only for data within the Landsat period, determined from reference DEMs and historical maps (Eqs. 1-11).**

| Parameter       | Prior                              | Posterior for all available data | Posterior for data from the Landsat era only |
|-----------------|------------------------------------|----------------------------------|----------------------------------------------|
|                 |                                    | Median   2.5%   97.5% of HDI     | Median   2.5%   97.5% of HDI                 |
| $\alpha$        | Normal (mean = 0, sd = 2.5)        | 0.17   -0.85   1.16              | 0.17   -0.99   1.32                          |
| $\beta$         | Normal (mean = 0, sd = 2.5)        | -0.48   -1.02   0.06             | -0.32   -0.64   0.04                         |
| $\sigma_\alpha$ | Normal (mean = 0, sd = 2.5) T(0, ) | 1.03   0.45   2.42               | 1.19   0.52   2.69                           |
| $\sigma_\beta$  | Normal (mean = 0, sd = 2.5) T(0, ) | 0.52   0.45   2.42               | 0.27   0.01   0.88                           |
| $\kappa$        | Normal (mean = 0, sd = 2.5) T(0, ) | 0.26   0.18   0.37               | 0.21   0.12   0.34                           |
| $\zeta$         | LkjCholesky(1) on $\mathbf{R}$     | 0.44   -0.55   0.97              | 0.01   -0.87   0.88                          |

Notes: Priors refer to standardised input data pairs of  $\Delta h$  and  $y$  using a mean of zero and unit standard deviation. T(·, ·) indicates a truncation of the distribution at a lower or upper boundary. sd, standard deviation. Degrees of freedom are constant ( $\nu = 3$ ) and have no posterior estimate.

**Table S5: Comparison of heights at stable terrain (ST) in Landeskarte over time and with different DEMs.**

| year        | ST1    | ST2    | ST3    | ST4    | ST5    | ST6     | ST7            | ST8     | ST9    | ST10    |
|-------------|--------|--------|--------|--------|--------|---------|----------------|---------|--------|---------|
| 1959        | 3465   | 3366   | 3242.6 | 4195   | 3810.7 | 3754    | 3641<br>(snow) | 2994.8  | 2951.7 | 3016.2  |
| 1968        | 3466   | 3366   | 3242.6 | 4195   | 3810.7 | 3754    | 3641<br>(snow) | 2994.8  | 2951.7 | 3016.2  |
| 1971        | 3466   | 3366   | 3242.6 | 4195   | 3810.7 | 3754    | 3641<br>(snow) | 2994.8  | 2951.7 | 3016.2  |
| 1975        | 3466   | 3366   | 3242.6 | 4195   | 3810.7 | 3754    | 3641<br>(snow) | 2994.8  | 2951.7 | 3016.2  |
| 1981        | 3463   | 3366   | 3242.6 | 4195   | 3810.7 | 3754    | 3639           | 2994.8  | 2951.8 | 3016.2  |
| 1987        | 3463   | 3366   | 3242.6 | 4195   | 3810.7 | 3754    | 3639           | 2994.8  | 2951.8 | 3016.2  |
| 1993        | 3463   | 3366   | 3242.6 | 4193   | 3810.7 | 3754    | 3639           | 2995    | 2952   | 3016    |
| 1999        | 3463   | 3366   | 3242.6 | 4193   | 3810.7 | 3754    | 3639           | 2995    | 2952   | 3016    |
| 2005        | 3463   | 3366   | 3242.6 | 4193   | 3810.7 | 3754    | 3639           | 2995    | 2952   | 3016    |
| 2011        | 3463   | 3366   | 3243   | 4193   | 3811   | 3754    | 3639           | 2995    | 2952   | 3016    |
| 2016        | 3463   | 3366   | 3243   | 4193   | 3811   | 3754    | 3639           | 2995    | 2952   | 3016    |
| 2020        | 3463   | 3366   | 3243   | 4194   | 3811   | 3756    | 3639           | 2995    | 2952   | 3016    |
| swissALTI3D | 3460.5 | 3364.4 | 3242.2 | NA     | 3810.2 | 3754.95 | 3638.1         | 2995.98 | 2953.1 | 3020.9  |
| GLO-90      | 3386.9 | 3277.9 | 3114.9 | 4133.2 | 3750.2 | 3694.3  | 3571.2         | 2858.1  | 2894.5 | 2956.98 |
| GLO-30      | 3389.9 | 3314.8 | 3119.6 | 4144.4 | 3791.7 | 3702.8  | 3584.9         | 2903.5  | 2926.2 | 3003.4  |

Figure S1: Webpage with historical maps (Landeskarte) from the Bundesamt für Landestopografie KOGIS (Koordination, Geoinformation und Services, <https://www.swisstopo.admin.ch>)

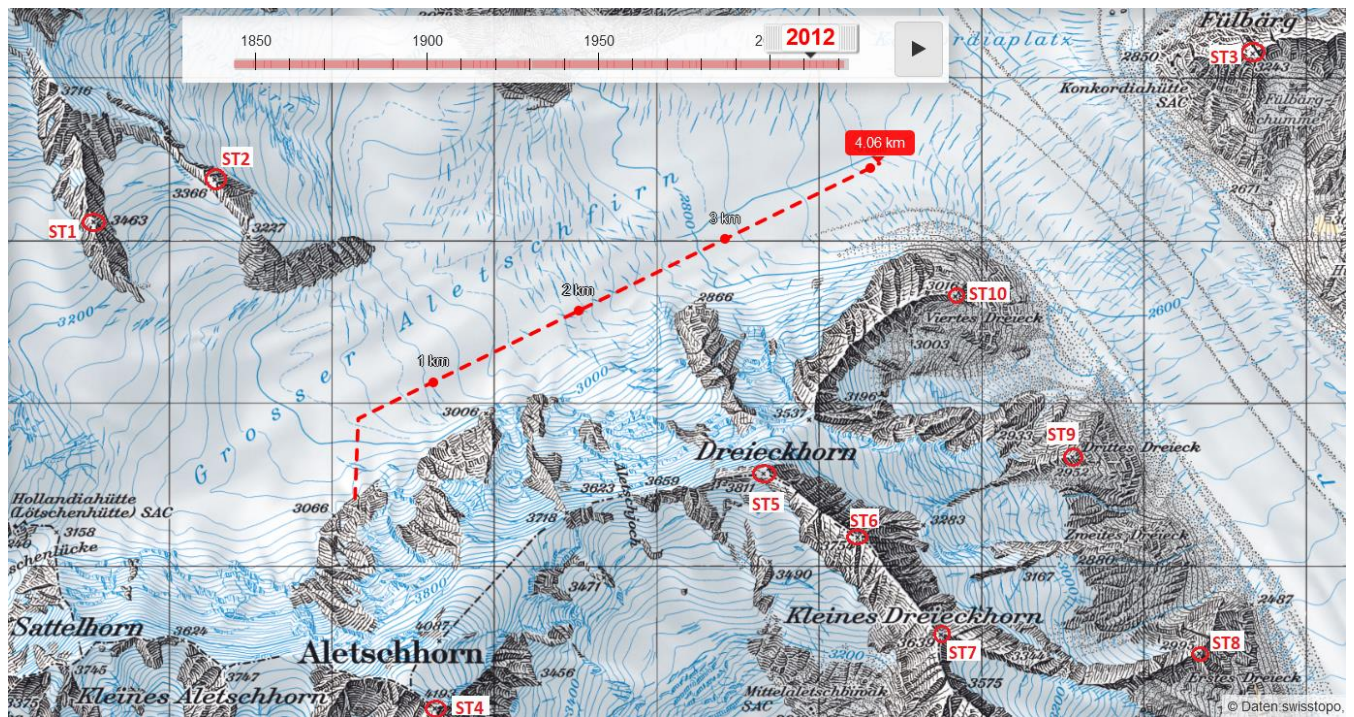

Notes: Red circles (ST1-ST10) represent locations of stable terrains (ST) that were investigated and compared with heights in different DEMs to proof the quality of the historical maps. Red dots represent locations we used to validate our results of glacier elevation changes.
